# Supplementary material for: A Toxoplasma dense granule protein, GRA24, modulates the early immune response to infection by promoting a direct and sustained host p38 MAPK activation
Source: PubMed Central journal article supplement — J Exp Med. 2013 Sep 23;210(10):2071–86. doi: 10.1084/jem.20130103 (PMC3782045; doi:10.1084/jem.20130103), 2013-09-23
Supplement: supp_jem.20130103_JEM_20130103_sm.pdf [file supp_jem.20130103_JEM_20130103_sm.pdf]

SUPPLEMENTAL MATERIAL

Braun et al., <http://www.jem.org/cgi/content/full/jem.20130103/DC1>

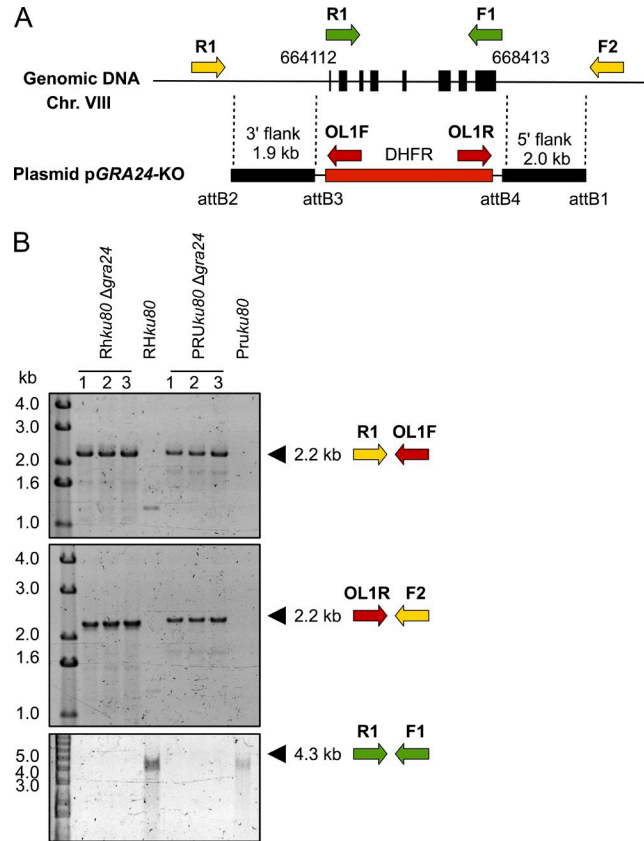

**Figure S1. Engineering *Toxoplasma* strains lacking *GRA24* gene in type I and II genetic background.** (A) Schematic representation of the *GRA24* locus (not at scale). Double homologous recombination between the knockout constructs and genomic DNA replaces *GRA24* coding sequence with the *dhfr* cassette used for positive selection. After transfection and selection of tachyzoites with the knockout constructions, parasites were cloned by limiting dilution. Genomic DNA was isolated for PCR analysis. (B) PCR reactions with primers R1 (yellow) and OL1F (red) or OL1R (red) and F2 (yellow) amplify a band of 2.2 kb specifying a successful knockout. Conversely, further PCR reactions failed to amplify *GRA24* coding sequence using primers R1 (green) and F1 (green) in both *RHku80Δgra24* and *Pruku80Δgra24* mutants, while a product of 4.3 kb was amplified at the expected size in their respective parental strains.

Table S1 is provided as an Excel file.
